# Supplementary material for: Measurement report: Biogenic VOC emissions profiles of Rapeseedleaf litter and their SOA formation potential
Source: Copernicus journal article supplement (doi:10.5194/acp-2021-135), 2021-03-08
Supplement: Supplementary file 1 [file acp-2021-135-supplement-version4.pdf]

# **Biogenic VOC emission profiles of rapeseed leaf litter and its SOA formation potential**

Letizia Abis<sup>1</sup> \*, Carmen Kalalian<sup>1</sup>, Bastien Lunardelli<sup>1</sup>, Tao Wang<sup>2</sup>, Liwu Zhang<sup>2</sup>, Jianmin Chen<sup>2</sup>, Sébastien Perrier<sup>1</sup>, Benjamin Loubet<sup>3</sup>, Raluca Ciuraru<sup>3</sup> and Christian George<sup>1</sup>

<sup>1</sup> Univ Lyon, Université Claude Bernard Lyon 1, CNRS, IRCELYON, F-69626, Villeurbanne, France.

<sup>2</sup>Shanghai Key Laboratory of Atmospheric Particle Pollution and Prevention, Department of Environmental Science & Engineering, Fudan University, Shanghai, 200433, Peoples' Republic of China.

<sup>3</sup>INRAE, UMR ECOSYS, AgroParisTech, Université Paris-Saclay, 78850, Thiverval-Grignon, France

\*Now working at: Technische Universität Berlin, Umweltchemie und Luftrinhaltung, Straße des 17. Juni 135, Berlin, 10623, Germany.

*Correspondence to:* Christian George (christian.george@ircelyon.univ-lyon1.fr)

This supplementary information contains:

- Appendix A
- Appendix B

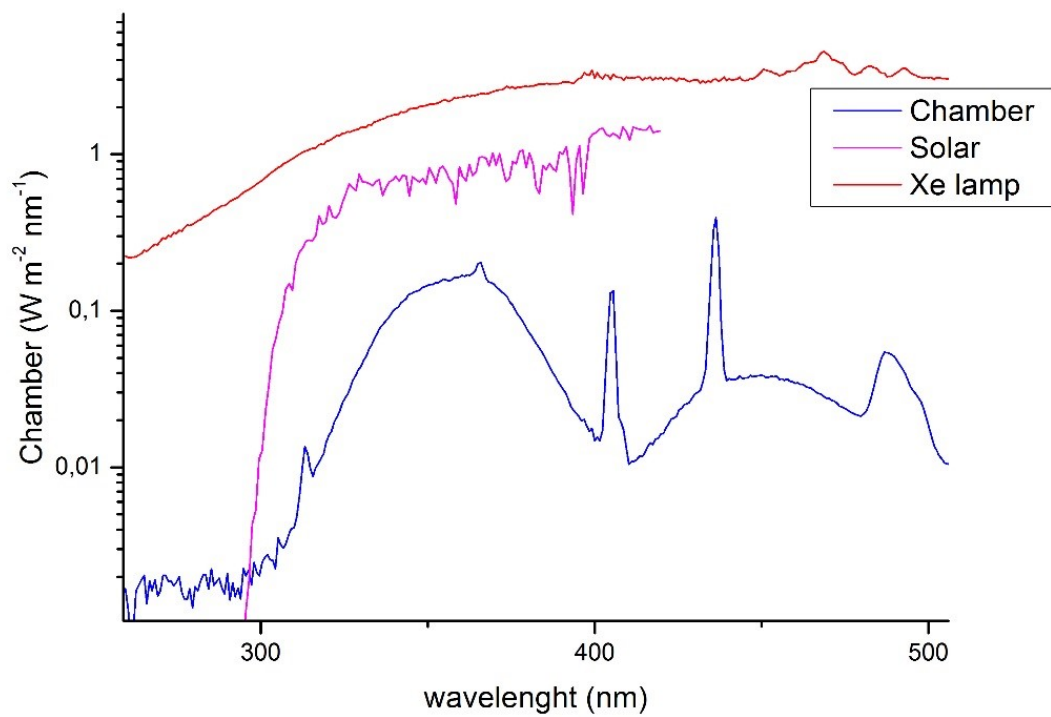

Figure A1. UV spectrum of the lamps used in the atmospheric simulation chamber compared to the solar spectrum and the spectrum generated by a Xenon lamp (Xe lamp).

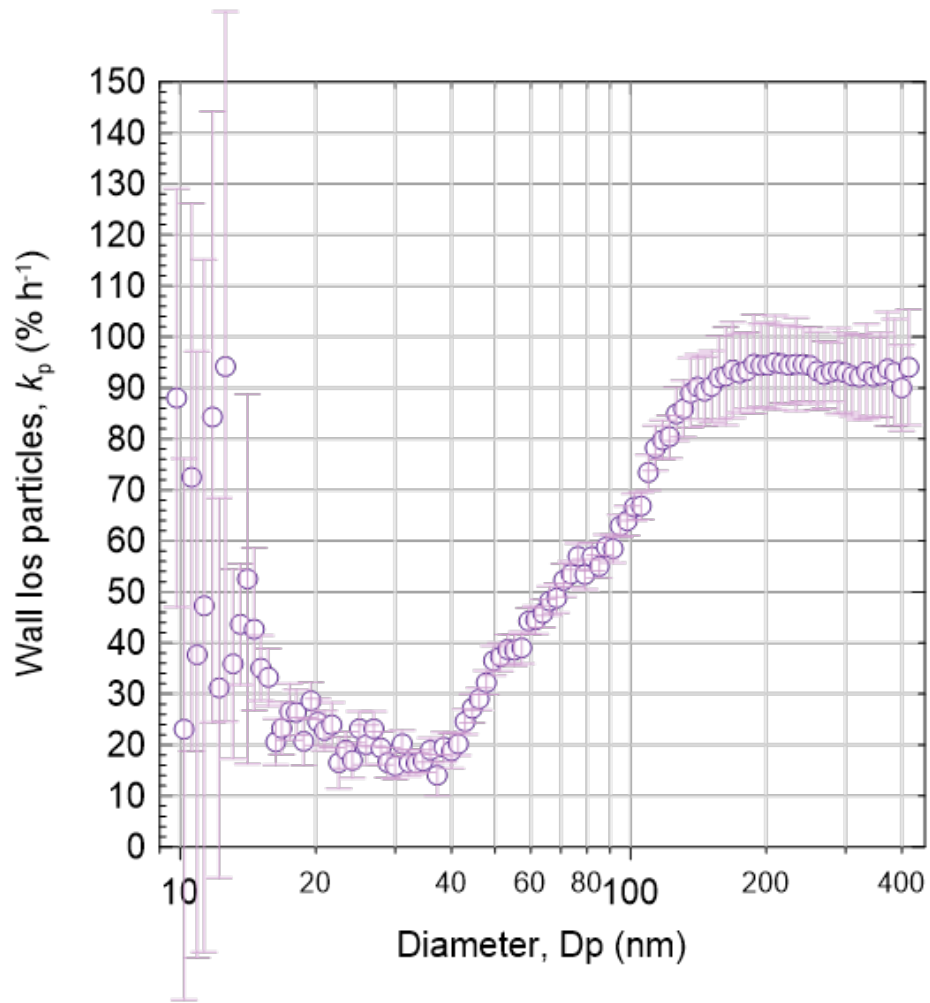

Figure A2. Estimation of the wall loss particles per diameter (nm) in the multiphase simulation chamber.

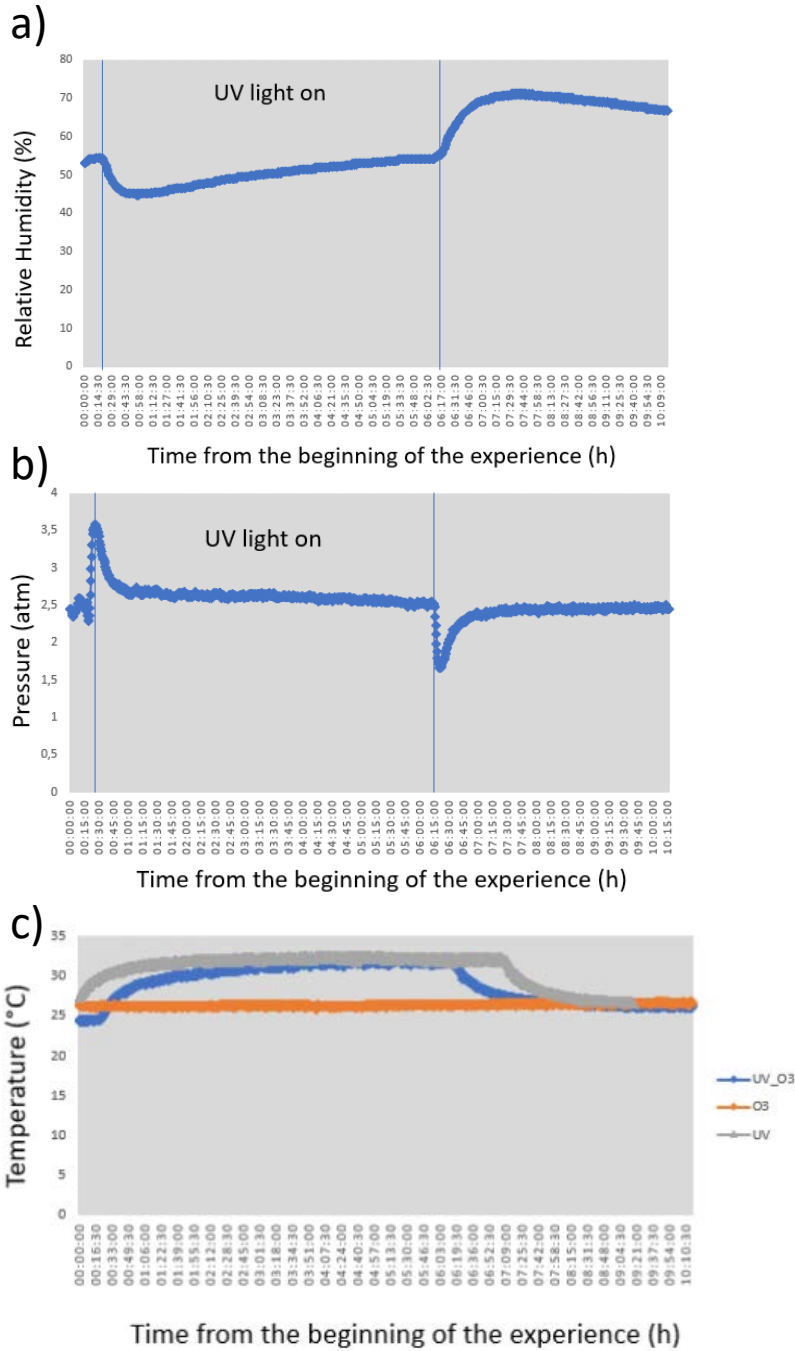

Figure A3. Evolution of a) Relative humidity, b) pressure and c) temperature during the experiment UV\_O<sub>3</sub>, O<sub>3</sub> and UV. Blue bars delimit the time where the UV light were on. The blue bar on the left of each graph also corresponds to the ozone injection time.

Table B1. Tentative identification and most likely formula of the most emitted compound for the UV, O<sub>3</sub>, and UV\_O<sub>3</sub> conditions.

| LIST OF THE MOST EMITTED COMPOUNDS |                                                                               |                                              |
|------------------------------------|-------------------------------------------------------------------------------|----------------------------------------------|
| Masses                             | Most likely formula                                                           | Tentative identification                     |
| 31.02                              | CH <sub>2</sub> O                                                             | Formaldehyde                                 |
| 33.03                              | CH <sub>4</sub> O                                                             | Methanol                                     |
| 42.03                              | C <sub>2</sub> H <sub>3</sub> N                                               | Acetonitrile                                 |
| 43.02                              | C <sub>2</sub> H <sub>2</sub> O                                               | Hexyl acetate fragment/ketene                |
| 43.03                              | C <sub>2</sub> H <sub>2</sub> O                                               |                                              |
| 43.05                              | C <sub>3</sub> H <sub>6</sub>                                                 | Propene                                      |
| 45.03                              | C <sub>2</sub> H <sub>4</sub> O                                               | Acetaldehyde                                 |
| 45.99                              |                                                                               |                                              |
| 46.03                              | CH <sub>3</sub> NO                                                            | Formamide                                    |
| 47.01                              | CH <sub>2</sub> O <sub>2</sub>                                                | Formic acid                                  |
| 47.02                              | CH <sub>2</sub> O <sub>2</sub> /C <sub>2</sub> H <sub>6</sub> O               | Formic acid/ethanol                          |
| 47.05                              | C <sub>2</sub> H <sub>6</sub> O                                               | Ethanol                                      |
| 49.01                              | CH <sub>4</sub> O <sub>2</sub>                                                | Methanediol                                  |
| 49.99                              | H <sub>3</sub> NS                                                             |                                              |
| 51.04                              | CH <sub>4</sub> O-H <sub>2</sub> O                                            | Methanol-water cluster                       |
| 55.93                              | C <sub>3</sub> H <sub>3</sub> O                                               | 1-Oxoprop-2-enyl                             |
| 57.03                              | C <sub>3</sub> H <sub>4</sub> O                                               | 2-propenal (acrolein)                        |
| 57.07                              | C <sub>4</sub> H <sub>10</sub> O/C <sub>4</sub> H <sub>8</sub>                | Butanol/butene                               |
| 59.04                              | C <sub>3</sub> H <sub>6</sub> O                                               | Acetone                                      |
| 60.05                              | C <sub>2</sub> H <sub>5</sub> NO                                              | Acetamide/ N-methyl formamide/ nitrosoethano |
| 61.03                              | C <sub>2</sub> H <sub>4</sub> O <sub>2</sub>                                  | Acetic acid                                  |
| 69.07                              | C <sub>5</sub> H <sub>8</sub>                                                 | Isoprene                                     |
| 71.05                              | C <sub>4</sub> H <sub>6</sub> O                                               | Methyl vinyl ketone (MVK)                    |
| 71.08                              | C <sub>5</sub> H <sub>10</sub>                                                | Pentene                                      |
| 73.03                              | C <sub>3</sub> H <sub>4</sub> O <sub>2</sub>                                  | 2-propenoic acid                             |
| 73.06                              | C <sub>4</sub> H <sub>8</sub> O                                               | 2-butanone, (MEK)/2-methylpropanal           |
| 74.06                              | C <sub>3</sub> H <sub>7</sub> NO                                              | N, N-dimethylformamide/Propanamide           |
| 75.01                              | C <sub>3</sub> H <sub>6</sub> O <sub>2</sub>                                  | Hydroxyacetone                               |
| 87.04                              | C <sub>4</sub> H <sub>6</sub> O <sub>2</sub>                                  | Butenoic acid                                |
| 87.07                              | C <sub>5</sub> H <sub>10</sub> O                                              | 2-methyl butanal/pentanone                   |
| 88.04                              | C <sub>3</sub> H <sub>5</sub> NO <sub>2</sub>                                 | Propene, 3-nitro-                            |
| 89.06                              | C <sub>5</sub> H <sub>12</sub> O/C <sub>4</sub> H <sub>8</sub> O <sub>2</sub> | 2-pentanol /Butanoic acid/Acetoin            |
| 90.06                              |                                                                               |                                              |
| 90.95                              |                                                                               |                                              |
| 93.95                              | C <sub>7</sub> H <sub>8</sub>                                                 | Toluene                                      |
| 94.99                              |                                                                               |                                              |
| 96.007                             | C <sub>5</sub> H <sub>5</sub> NO/C <sub>6</sub> H <sub>9</sub> N              | Pyridine-N-oxide/2,4-dimethylpyrrole         |
| 101.06                             | C <sub>5</sub> H <sub>8</sub> O <sub>2</sub>                                  | 2,3-Pentanedione                             |
| 108.95                             | C <sub>7</sub> H <sub>9</sub> N                                               | Pyridine, 2,4-dimethyl-                      |
| 123.94                             |                                                                               |                                              |
| 125.95                             |                                                                               |                                              |
